# Supplementary material for: Low Cardiovascular Disease Awareness in Chilean Women: Insights from the ESCI Project
Source: PubMed Central journal article supplement (PMC7427666; doi:10.5334/gh.534), 2020-08-12
Supplement: gh-15-1-534-s1.pdf [file gh-15-1-534-s1.pdf]

## **Supplementary Appendix**

### **I- Methodology**

|                                       |   |
|---------------------------------------|---|
| Table S1: Design of the sample units  | 2 |
| Survey: Awareness questions (Spanish) | 3 |

### **II- Results and Statistical analysis data**

|                                                                                                                    |    |
|--------------------------------------------------------------------------------------------------------------------|----|
| Table S2: Multivariate analysis of awareness of breast cancer and depression/stress as the greatest health problem | 10 |
| Table S3: Awareness Greatest Health Problem By Educational Level                                                   | 11 |
| Table S4: Multivariate analysis of awareness of CVD and breast cancer as main cause of death by educational level  | 12 |
| Table S5: Multivariate analysis of awareness of CVD as main cause of death by CVD family history                   | 13 |

**Table S1** - Conformation of the nine boroughs/communes strata of Santiago, Metropolitan Region, and 18 primary sampling units according to socioeconomic level and age bracket for the study design

| Boroughs by average household per capita income       | Boroughs according to age group based on % of predominant age group of women at the Metropolitan Region |                                                                                            |                                                                                                                           | Total Boroughs or communes |
|-------------------------------------------------------|---------------------------------------------------------------------------------------------------------|--------------------------------------------------------------------------------------------|---------------------------------------------------------------------------------------------------------------------------|----------------------------|
|                                                       | Greater % Women 35-44 years old                                                                         | Greater % Women 45-54 years old                                                            | Greater % Women 55-70 years old                                                                                           |                            |
| <b>Lower Level from \$141.355 to \$173.879 pesos</b>  | Renca<br>Lampa<br>Tiltil<br>San Joaquín*<br>Pudahuel*                                                   | Lo Espejo*<br>Alhué<br>Isla de Maipo*<br>Curacaví                                          | San Pedro<br>San Bernardo<br>El Bosque<br>Recoleta<br>Cerro Navia*<br>La Pintana<br>María Pinto<br>Melipilla*<br>Lo Prado | 18                         |
| <b>Medium Level from \$176.645 to \$223.884 pesos</b> | Puente Alto*<br>Colina*<br>San Ramón<br>Cerrillos<br>Buin<br>El Monte                                   | Pedro Aguirre Cerda<br>Pirque<br>Estación Central*<br>Quilicura*<br>Macul<br>Padre Hurtado | La Granja*<br>Paine<br>La Cisterna<br>Conchalí<br>Quinta Normal*                                                          | 17                         |
| <b>High Level from \$234.950 to \$1.412.161 pesos</b> | Huechuraba*<br>Peñaflor<br>Peñalolen*<br>Talagante<br>La Reina<br>Lo Barnechea<br>Providencia           | San Miguel<br>San José de Maipo<br>Maipú*<br>La Florida*<br>Calera de Tango<br>Ñuñoa       | Independencia<br>Santiago*<br>Las Condes*<br>Vitacura                                                                     | 17                         |
| <b>Total boroughs or communes</b>                     | 18                                                                                                      | 16                                                                                         | 18                                                                                                                        | 52                         |

Source: Own preparation based on the CASEN 2011 Survey<sup>17</sup> /

(\*): Selected boroughs or communes

**II- Cardiovascular disease and stroke awareness survey ( In Spanish as was applied) . It only includes the questions related to awareness of CVD, therefore it doesn't include the entire survey for ESCI project.**

**DTA.100** En general, ¿Cómo calificaría hoy su estado de salud?

LEER ALTERNATIVAS.

1. Muy mala.

2. Mala.

3. Más o menos.

4. Buena.

5. Muy buena.

8. *NO SABE.*

9. *NO RESPONDE.*

**AWA.010** ¿Cuál cree Ud. que es el mayor problema de salud que enfrenta la mujer actualmente?

NO LEER ALTERNATIVAS.

1. Accidente cerebrovascular.

2. Adicción a drogas/alcoholismo.

3. Alzheimer.

4. Cáncer de mama.

5. Cáncer pulmonar.

6. Cáncer (en general).

7. Diabetes.

8. Enfermedades cardiacas/ataque cardíaco.

- 9. Obesidad.
- 10. Osteoporosis.
- 11. SIDA.
- 12. Tabaco.
- 13. Otro. Especifique: \_\_\_\_\_
- 88. *NO SABE.*
- 99. *NO RESPONDE.*

**AWA.020** Hasta donde Ud. sabe, ¿Cuál es la principal causa de muerte para todas las mujeres?

NO LEER ALTERNATIVAS.

- 1. Accidente cerebrovascular.
- 2. Adicción a drogas/alcoholismo.
- 3. Alzheimer.
- 4. Cáncer de mama.
- 5. Cáncer pulmonar.
- 6. Cáncer (en general).
- 7. Crimen violento.
- 8. Diabetes.
- 9. Enfermedades cardiacas/ataque cardíaco.
- 10. Muerte accidental.
- 11. Osteoporosis.
- 12. SIDA.
- 13. Tabaco.
- 14. Otro. Especifique: \_\_\_\_\_

88. *NO SABE.*

99. *NO RESPONDE.*

**AWA.030** ¿Ud. ha visto, escuchado o leído información acerca de enfermedades cardíacas dentro de los últimos 12 meses?

1. Sí.

2. No. *Pase a AWA.040*

8. *NO SABE. Pase a AWA.040*

9. *NO RESPONDE. Pase a AWA.040*

**AWA.035** ¿Dónde vio, escuchó o leyó esta información?

NO LEER ALTERNATIVAS.

MARQUE TODAS LAS QUE CORRESPONDA.

*Permitir respuesta múltiple.*

1. En una revista.

2. En la radio.

3. En un libro.

4. En televisión.

5. Información de un folleto, panfleto, etc.

6. Entregada por el médico, enfermera u otro profesional de la salud.

7. En un periódico.

8. En internet.

9. De un amigo o pariente.

10. Biblioteca.

11. Otro. Especifique: \_\_\_\_\_

88. *NO SABE.*

99. *NO RESPONDE*

**AWA.040** ¿Ud. ha visto, escuchado (oído) o leído algo acerca del símbolo “vestido rojo” o “red dress symbol”? MOSTRAR TARJETA AWA.040.

1. Sí.

2. No.

8. *NO SABE.*

9. *NO RESPONDE.*

**AWA.050** ¿Algún médico, o personal médico como enfermera o nutricionista, le ha hablado de las enfermedades cardíacas o cardiovasculares?

1. Sí.

2. No.

8. *NO SABE.*

9. *NO RESPONDE.*

**AWA.060** ¿Que tan informada está Ud. respecto a enfermedades cardíacas o cardiovasculares en la mujer? Ud. diría que está...

LEER ALTERNATIVAS.

1. Muy bien informada.

2. Bien informada.

3. Medianamente informada.

4. No informada en lo absoluto.

8. *NO SABE.*

9. *NO RESPONDE.*

**AWA.070** ¿Qué tan informada está Ud. respecto al ataque cerebral o cerebrovascular en las mujeres? Ud. diría que está...

LEER ALTERNATIVAS.

1. Muy bien informada.

2. Bien informada.

3. Medianamente informada.

4. No informada en lo absoluto.

8. *NO SABE.*

9. *NO RESPONDE.*

**AWA.080** Basándose en lo que Ud. sabe, ¿Cuáles son las mayores causas de enfermedades cardíacas o cardiovasculares?

NO LEER LAS ALTERNATIVAS.

MARQUE TODAS LAS QUE CORRESPONDA.

*Permitir respuesta múltiple.*

1. Historia familiar de enfermedades cardíacas (cardiovasculares).

2. Envejecimiento.

3. Estar con sobrepeso.

4. Diabetes.

5. Beber alcohol.

6. Presión arterial alta (hipertensión).

- 7. Colesterol alto.
- 8. Triglicéridos altos.
- 9. Bajos niveles de estrógenos.
- 10. Menopausia.
- 11. No hacer ejercicio.
- 12. Fumar.
- 13. Estrés.
- 14. Accidente cerebrovascular.
- 15. Otra. Especifique: \_\_\_\_\_
- 88. *NO SABE.*
- 99. *NO RESPONDE.*

**AWA.090** Basado en lo que Ud. sabe ¿Qué signos de alarma asocia Ud. con tener un ataque cardíaco?

NO LEER ALTERNATIVAS.

MARQUE TODAS LAS QUE CORRESPONDA.

*Permitir respuesta múltiple*

- 1. Dificultad respiratoria.
- 2. Dolor de pecho.
- 3. Dolor o adormecimiento que se irradia a espaldas, cuello o brazos.
- 4. Fatiga.
- 5. Nauseas.
- 6. Opresión (presión) en el pecho.
- 7. Otra. Especifique: \_\_\_\_\_
- 88. *NO SABE.*



99. *NO RESPONDE.*

**AWA.100** Si Ud. cree que alguien está teniendo un ataque cardíaco, ¿Qué es la primera cosa que Ud. haría?

NO LEER ALTERNATIVAS.

1. Llevarlo a un hospital/clínica.

2. Llevarlo a ver al doctor.

3. Llamar a la ambulancia de urgencia (131, SAMU).

4. Llamar a su pareja o un familiar.

5. Otra. Especifique: \_\_\_\_\_

88. *NO SABE.*

99. *NO RESPONDE.*

**Table S2.** Multivariate analysis of awareness of **breast cancer and depression/stress** as the greatest health problem in women by educational level

|                                | Model 1                  |                | Model 2            |                |
|--------------------------------|--------------------------|----------------|--------------------|----------------|
|                                | <b>Breast Cancer</b>     |                |                    |                |
| Educational Level <sup>a</sup> | OR                       | P <sup>b</sup> | OR                 | P <sup>b</sup> |
| High                           | Ref 1.0                  |                | Ref 1.0            |                |
| Middle                         | 2.08 [1.28 -3.40 ]       | < 0.01         | 2.05 [1.25 -3.36 ] | < 0.01         |
| Low                            | 1.65 [0.95 -2.87 ]       | 0.08           | 1.63 [0.95 -2.85 ] | 0.08           |
|                                | <b>Depression/stress</b> |                |                    |                |
| Educational Level <sup>a</sup> | OR                       | P <sup>b</sup> | OR                 | P <sup>b</sup> |
| High                           | Ref 1.0                  |                | Ref 1.0            |                |
| Middle                         | 0.23 [0.09 -0.60 ]       | < 0.01         | 0.25 [0.09 -0.65 ] | < 0.01         |
| Low                            | 0.31 [0.16 -0.62 ]       | < 0.001        | 0.33 [0.16 -0.67 ] | < 0.01         |

<sup>a</sup> Logistic regression

<sup>b</sup> Likelihood ratio test p < 0.01

Model 1: Crude OR (univariate)

Model2: Adjusted OR with age.

**Table S3. Awareness of Greatest Health Problem By Educational Level**

**Adjusted by Age**

| Greatest health problem  | Educational level |        |      | P <sup>a</sup> |
|--------------------------|-------------------|--------|------|----------------|
|                          | Lower             | Middle | High |                |
| Stroke %                 | 0.7               | 1.2    | 1.5  | NS             |
| Breast Cancer %          | 22.2              | 26.5   | 14.7 | < 0.01         |
| Lung Cancer %            | 0.0               | 0.1    | 0.0  | NS             |
| Cancer (in general) %    | 16.0              | 18.0   | 12.0 | NS             |
| Diabetes %               | 23.2              | 14.6   | 14.3 | 0.03           |
| Cardiovascular Disease % | 5.1               | 3.6    | 1.9  | NS             |
| Obesity %                | 2.3               | 10.5   | 18.1 | < 0.0001       |
| Smoking (%)              | 0.0               | 0.7    | 0.6  | NS             |
| Other %                  | 18.8              | 17.5   | 32.7 | < 0.001        |
| Do not know %            | 5.4               | 2.8    | 1.4  | 0.10           |

<sup>a</sup> Logistic regression, adjusted by age.

**Table S4.** Multivariate analysis of awareness of health conditions as main cause of death in women by educational level

|                                | Model 1              |              |                | Model 2 |              |                |
|--------------------------------|----------------------|--------------|----------------|---------|--------------|----------------|
|                                | <b>Breast Cancer</b> |              |                |         |              |                |
| Educational Level <sup>a</sup> | OR                   | 95% C.I.     | P <sup>b</sup> | OR      | 95% C.I.     | P <sup>b</sup> |
| High                           | Ref 1.0              |              |                | Ref 1.0 |              |                |
| Middle                         | 0.88                 | [0.61 -1.28] | NS             | 0.87    | [0.56 -1.35] | NS             |
| Low                            | 0.83                 | [0.54 -1.28] | NS             | 0.92    | [0.63 -1.35] | NS             |
|                                | <b>CVD</b>           |              |                |         |              |                |
| Educational Level <sup>a</sup> | OR                   | 95% C.I.     | P <sup>b</sup> | OR      | 95% C.I.     | P <sup>b</sup> |
| High                           | Ref 1.0              |              |                | Ref 1.0 |              |                |
| Middle                         | 0.52                 | [0.32 -0.86] | 0.01           | 0.41    | [0.24 -0.69] | < 0.01         |
| Low                            | 0.78                 | [0.45 -1.34] | NS             | 0.60    | [0.34 -1.06] | NS             |

<sup>a</sup> Logistic regression

<sup>b</sup> Likelihood ratio test p < 0.01

Model 1: Crude OR (univariate)

Model2: Adjusted OR with age.

**Table S5.** Multivariate analysis of awareness of CVD as main cause of death in women by CVD family history

|                                    | Model 1    |              |                | Model 2 |              |                |
|------------------------------------|------------|--------------|----------------|---------|--------------|----------------|
|                                    | <b>CVD</b> |              |                |         |              |                |
| Family History of CVD <sup>a</sup> | OR         | 95% C.I.     | P <sup>a</sup> | OR      | 95% C.I.     | P <sup>b</sup> |
| Absent                             | Ref 1.0    |              |                | Ref 1.0 |              |                |
| Present                            | 1.72       | [1.12 -2.66] | 0.01           | 1.72    | [1.11 -2.66] | 0.02           |

<sup>a</sup> Logistic regression

<sup>b</sup> Likelihood ratio test p = 0.03

Model 1: Crude OR (univariate)

Model 2: Adjusted OR with educational level.
